# Supplementary material for: Chemotactic and Angiogenic Potential of Mineralized Collagen Scaffolds Functionalized with Naturally Occurring Bioactive Factor Mixtures to Stimulate Bone Regeneration
Source: MDPI journal article supplement (doi:10.3390/ijms22115836), 2021-05-29
Supplement: s1 [file s1]

## Supplementary Material

**Table S1.** Daily release of bioactive factors (absolute values) from PL-, HCM- and ATE-functionalized mineralized collagen scaffolds. Therefore, functionalized scaffolds were incubated with 1 mL release medium for 14 days with collecting supernatants on day 0, 1, 2, 3, 7, 10 and 14. The same amount of bioactive factor mixtures that was used for functionalization of the single scaffolds (10  $\mu$ L) were added to 990  $\mu$ L release medium representing a 100 % control (mean  $\pm$  SD,  $n = 3$ ; nd: not detectable).

| Protein/Cytokine  | Concentration in pg/mL |                        |                       |
|-------------------|------------------------|------------------------|-----------------------|
|                   | PL                     | HCM                    | ATE                   |
| <b>VEGF</b>       |                        |                        |                       |
| 100 % control     | 142.70                 | 28947.10 $\pm$ 3268.77 | 240.48                |
| d0                | 2.01 $\pm$ 1.68        | 3075.81 $\pm$ 2084.48  | 43.96 $\pm$ 17.12     |
| d1                | 78.53 $\pm$ 7.82       | 11957.44 $\pm$ 975.73  | 126.73 $\pm$ 25.84    |
| d2                | 0.99 $\pm$ 0.88        | 2054.87 $\pm$ 640.63   | nd                    |
| d3                | nd                     | 681.83 $\pm$ 321.73    | nd                    |
| d7                | nd                     | 934.20 $\pm$ 351.07    | nd                    |
| d10               | nd                     | 214.25 $\pm$ 70.91     | nd                    |
| d14               | 0.18 $\pm$ 1.51        | 106.84 $\pm$ 42.11     | nd                    |
| <b>PDGF-BB</b>    |                        |                        |                       |
| 100 % control     | 3466.45                | nd                     | nd                    |
| d0                | 54.98 $\pm$ 29.15      | nd                     | nd                    |
| d1                | 644.03 $\pm$ 63.20     | nd                     | nd                    |
| d2                | 153.59 $\pm$ 19.91     | nd                     | nd                    |
| d3                | 119.33 $\pm$ 10.08     | nd                     | nd                    |
| d7                | 189.43 $\pm$ 29.70     | nd                     | nd                    |
| d10               | 95.13 $\pm$ 8.58       | nd                     | nd                    |
| d14               | 75.81 $\pm$ 7.58       | nd                     | nd                    |
| <b>Angiogenin</b> |                        |                        |                       |
| 100 % control     | 1098.29                | 321.04                 | 1261.21               |
| d0                | 0.05 $\pm$ 0.09        | nd                     | 235.56 $\pm$ 104.22   |
| d1                | 792.09 $\pm$ 147.19    | 288.47 $\pm$ 168.33    | 3083.63 $\pm$ 3561.23 |
| d2                | 143.34 $\pm$ 24.62     | 23.75 $\pm$ 12.03      | 306.06 $\pm$ 144.85   |
| d3                | 1.85 $\pm$ 1.87        | 0.02 $\pm$ 0.02        | 82.69 $\pm$ 90.28     |
| d7                | nd                     | nd                     | 27.31 $\pm$ 44.69     |
| d10               | nd                     | nd                     | nd                    |
| d14               | nd                     | nd                     | nd                    |
| <b>TIMP-1</b>     |                        |                        |                       |
| 100 % control     | 399.87 $\pm$ 28.94     | 1037.03 $\pm$ 0.77     | 603.60 $\pm$ 10.90    |
| d0                | 206.31 $\pm$ 18.25     | 838.86 $\pm$ 28.96     | 343.28 $\pm$ 45.46    |
| d1                | 333.40 $\pm$ 22.93     | 1272.73 $\pm$ 126.46   | 540.97 $\pm$ 59.88    |
| d2                | 162.77 $\pm$ 3.44      | 409.06 $\pm$ 59.81     | 116.74 $\pm$ 40.88    |

|                |                 |                  |                  |
|----------------|-----------------|------------------|------------------|
| d3             | 42.70 ± 10.48   | 166.88 ± 24.31   | 2.12 ± 2.05      |
| d7             | 54.84 ± 5.30    | 185.45 ± 18.41   | nd               |
| d10            | 22.83 ± 11.24   | 99.70 ± 15.40    | nd               |
| d14            | 14.70 ± 2.56    | 79.21 ± 16.47    | nd               |
| <b>CXCL1</b>   |                 |                  |                  |
| 100 % control  | 767.91 ± 8.78   | 1042.44 ± 17.75  | 2736.66 ± 54.62  |
| d0             | nd              | 86.62 ± 31.05    | 1832.48 ± 325.80 |
| d1             | 450.40 ± 42.63  | 720.13 ± 22.95   | 2674.45 ± 13.49  |
| d2             | 108.18 ± 12.74  | 66.22 ± 14.51    | 1432.68 ± 262.70 |
| d3             | nd              | nd               | 501.41 ± 288.07  |
| d7             | 24.27 ± 15.74   | nd               | 384.31 ± 201.50  |
| d10            | nd              | nd               | 51.23 ± 59.58    |
| d14            | nd              | nd               | 9.51 ± 16.48     |
| <b>IGFBP-1</b> |                 |                  |                  |
| 100 % control  | 709.67 ± 501.67 | 2307.32          | 276.89           |
| d0             | 20.15 ± 10.31   | 111.52 ± 103.65  | 4.66 ± 3.57      |
| d1             | 444.12 ± 54.00  | 470.83 ± 166.08  | 16.72 ± 3.44     |
| d2             | 2.97 ± 0.37     | 105.94 ± 7.88    | 2.85 ± 1.13      |
| d3             | nd              | 71.07 ± 13.81    | 1.07 ± 0.29      |
| d7             | nd              | 198.25 ± 69.31   | 2.77 ± 0.58      |
| d10            | nd              | 42.55 ± 9.82     | 0.48 ± 0.11      |
| d14            | nd              | 27.78 ± 2.24     | 0.48 ± 0.27      |
| <b>IL-6</b>    |                 |                  |                  |
| 100 % control  | nd              | 1023.08 ± 108.01 | 1844.45          |
| d0             | nd              | 108.70 ± 43.55   | 443.46 ± 112.28  |
| d1             | nd              | 95.97 ± 5.92     | 649.79 ± 58.44   |
| d2             | nd              | nd               | 143.53 ± 35.57   |
| d3             | nd              | nd               | 77.88 ± 6.13     |
| d7             | nd              | nd               | 77.10 ± 3.84     |
| d10            | nd              | nd               | nd               |
| d14            | nd              | nd               | nd               |
